# Supplementary material for: Characterization of Endogenous Auxins and Gibberellins Produced by Chlorella sorokiniana TH01 under Phototrophic and Mixtrophic Cultivation Modes toward Applications in Microalgal Biorefinery and Crop Research
Source: Hindawi journal article supplement (doi:10.1155/2020/4910621), 2020-06-04
Supplement: f1 [file 4910621.f1.docx]

**Supporting Information**

**Characterization of Endogenous Auxins and Gibberellins Produced by *Chlorella sorokiniana* TH01 Under Phototrophic and Mixtrophic Cultivation Modes Toward Applications in Microalgal Biorefinery and Crop Research**

**Thi Cam Van Do1,2,3, Dang Thuan Tran4, Truong Giang Le1,4, Quang Trung Nguyen1,2,* (** <https://orcid.org/0000-0003-3835-0703>)

*1Graduate University of Science and Technology, Vietnam Academy of Science and Technology, 18 Hoang Quoc Viet, Cau Giay, Ha Noi, Vietnam*

*2Center for Research and Technology Transfer, Vietnam Academy of Science and Technology, 18 Hoang Quoc Viet, Cau Giay, Ha Noi, Vietnam*

*3Department of Chemical Technology, Hanoi University of Industry, No. 298 Cau Dien, Bac Tu Liem, Ha Noi, Vietnam.*

*4Institute of Chemistry, Vietnam Academy of Science and Technology, 18 Hoang Quoc Viet, Cau Giay, Ha Noi, Vietnam*

*Correspondence to: Associate Professor Quang Trung Nguyen (Q.T. Nguyen)

Graduate University of Science and Technology, Vietnam Academy of Science and Technology, 18 Hoang Quoc Viet, Cau Giay, Ha Noi, Vietnam

Tel: (84) 24 37568422; Fax: (84) 24 37568422; E-mail: [nqt79@yahoo.com](mailto:nqt79@yahoo.com)

**Table S1.** Response characteristics of the phytohormones standards using HPLC-ESI-MS/MS.

| **Compound** | **MW**  **(g/mol)** | **RT (min)** | **MS** | **Scan mode** |
| --- | --- | --- | --- | --- |
| Ki | 215.21 | 5.08 | 215.50–216.50 | Positive |
| *t*ZR | 351.36 | 4.27 | 351.50–352.50 | Positive |
| iP | 203.24 | 5.88 | 203.50–204.50 | Positive |
| iPR | 335.36 | 5.51 | 335.50–336.50 | Positive |
| *t*Z | 219.24 | 4.46 | 219.50–220.50 | Positive |
| BA | 225.25 | 5.7 | 225.50–226.50 | Positive |
| DHzR | 353.37 | 5.73 | 353.50–354.50 | Positive |
| GA3 | 346.37 | 4.56 | 344.50–345.50 | Negative |
| GA4 | 332.39 | 6.97 | 330.50–331.50 | Negative |
| GA7 | 330.38 | 6.7 | 328.50–329.50 | Negative |
| IBA | 203.24 | 5.9 | 201.5–202.50 | Negative |
| IPA | 189.21 | 3.97 | 187.5–188.50 | Negative |
| ICA | 161.16 | 5.09 | 159.50–160.50 | Negative |
| IAA | 175.18 | 4.08 | 173.50–174.50 | Negative |
| MW: Molecular weight  RT: Retention time  Kinetin (Ki), *trans*-Zeatin riboside (*t*ZR), isopentenyladenine (iP), N(6)-isopentenyladenosine (iPR), *trans*-zeatin (*t*Z), 6-benzylaminopurine (BA), and dihydrozeatin riboside (DHzR), gibberellic acid (GA3), gibberellin A4 (GA4), and gibberellin A7 (GA7), indole-3-butyric acid (IBA), 3-indolepropionic acid (IPA), indole-3-carboxylic acid (ICA), and indole-3-acetic acid (IAA) | | | | |

**Table S2.** Linear regression data for fourteen phytohormones (n=6).

| Compound | Calibration curve | R2 | Linear range (ppb) | LOD  (ppb) | LOQ  (ppb) |
| --- | --- | --- | --- | --- | --- |
| Ki | y = 302.79x – 578.14 | 1 | 50 – 2000 | 12.49 | 37.86 |
| *t*ZR | y = 39.629x + 43.705 | 0.9997 | 50 – 2000 | 87.48 | 265.08 |
| iP | y = 1767.7x – 11038 | 0.9999 | 50 – 2000 | 57.97 | 175.66 |
| iPR | y = 17.571x – 235.32 | 0.9998 | 50 – 2000 | 69.07 | 209.31 |
| *t*Z | y = 411.93x + 6175.9 | 0.999 | 50 – 2000 | 156.74 | 474.97 |
| BA | y = 397.57x + 1447.5 | 0.9999 | 50 – 2000 | 35.68 | 108.11 |
| DHzR | y = 10.052x – 248 | 0.9993 | 50 – 2000 | 132.32 | 400.96 |
| GA3 | y = 22.212x + 1016 | 0.9997 | 50 – 2000 | 84.83 | 257.04 |
| GA4 | y = 23.323x + 409.16 | 0.9995 | 50 – 2000 | 110.59 | 335.13 |
| GA7 | y = 8.0171x + 328.12 | 0.9997 | 50 – 2000 | 82.69 | 250.56 |
| IBA | y = 1.6311x + 27.387 | 0.999 | 50 – 2000 | 153.41 | 464.89 |
| IPA | y = 5.8593x – 137.2 | 0.9992 | 50 – 2000 | 136.24 | 412.85 |
| ICA | y = 3.4485x + 51.873 | 0.9996 | 50 – 2000 | 94.23 | 285.56 |
| IAA | y = 18.71x – 12.625 | 1 | 50 – 2000 | 3.56 | 10.80 |
| LOD: Limit of detection  LOQ: Limit of quantitation  Kinetin (Ki), *trans*-Zeatin riboside (*t*ZR), isopentenyladenine (iP), N6-(2-isopentenyl)adenine (2iP), N(6)-isopentenyladenosine (iPR), *trans*-zeatin (*t*Z), 6-benzylaminopurine (BA), and dihydrozeatin riboside (DHzR), gibberellic acid (GA3), gibberellin A4 (GA4), and gibberellin A7 (GA7), indole-3-butyric acid (IBA), 3-indolepropionic acid (IPA), indole-3-carboxylic acid (ICA), and indole-3-acetic acid (IAA) | | | | | |

| 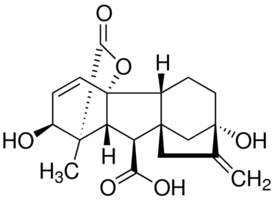  Gibberellin A3 (GA3) | 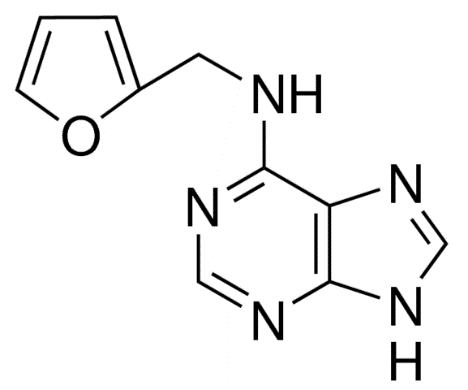  Kinetin (Ki) | 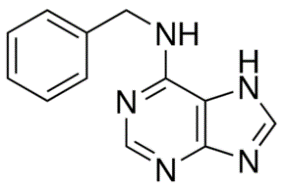  6-Benzylaminopurine (BA) |
| --- | --- | --- |
| [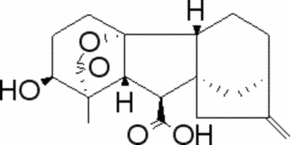](https://www.sigmaaldrich.com/catalog/product/sigma/g7276?lang=en&region=VN&cm_sp=Insite-_-prodRecCold_xviews-_-prodRecCold10-5)  Gibberellin A4 (GA4) | 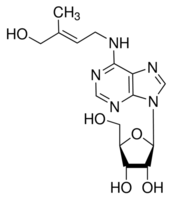  *trans*-Zeatin riboside (*t*ZR) | 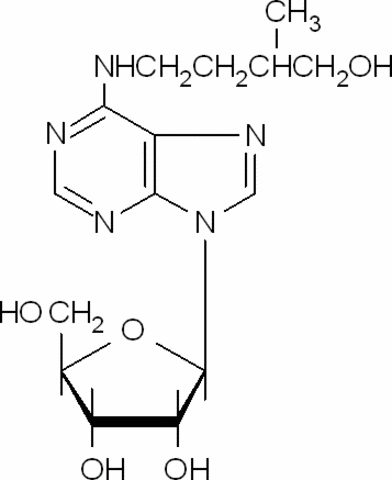  Dihydrozeatin riboside (DHzR) |
| 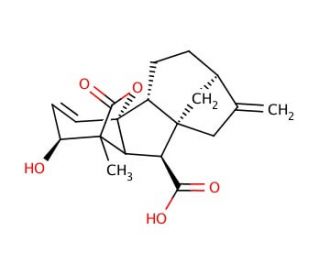  Gibberellin A7 (GA7) | 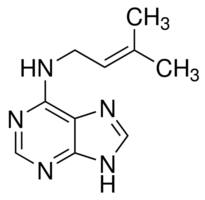  N6-(2-Isopentenyl)adenine (iP) | 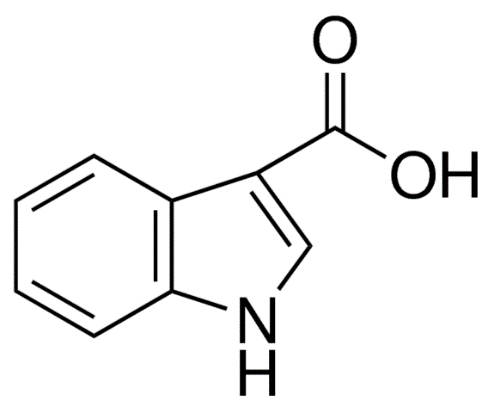  Indole-3-carboxylic acid **(**ICA**)** |
| [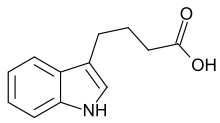](https://en.wikipedia.org/wiki/File:Indole-3-butyric_acid_structure.svg)  Indole-3-butyric acid (IBA) | 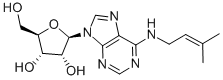  N(6)-Isopentenyladenosine (iPR) | [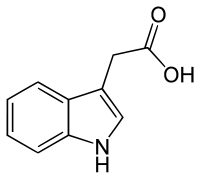](https://en.wikipedia.org/wiki/File:Indol-3-ylacetic_acid.svg)  Indole-3-acetic acid (IAA) |
| [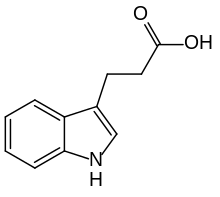](https://en.wikipedia.org/wiki/File:3-Indolepropionic_acid_skeletal.svg)  3-Indolepropionic acid (IPA) | 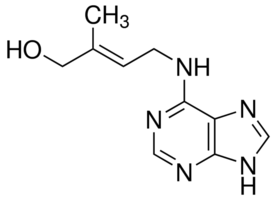  trans-zeatin (*t*Z) |  |

**Fig. S1.** Structure of the fourteen plant hormones.


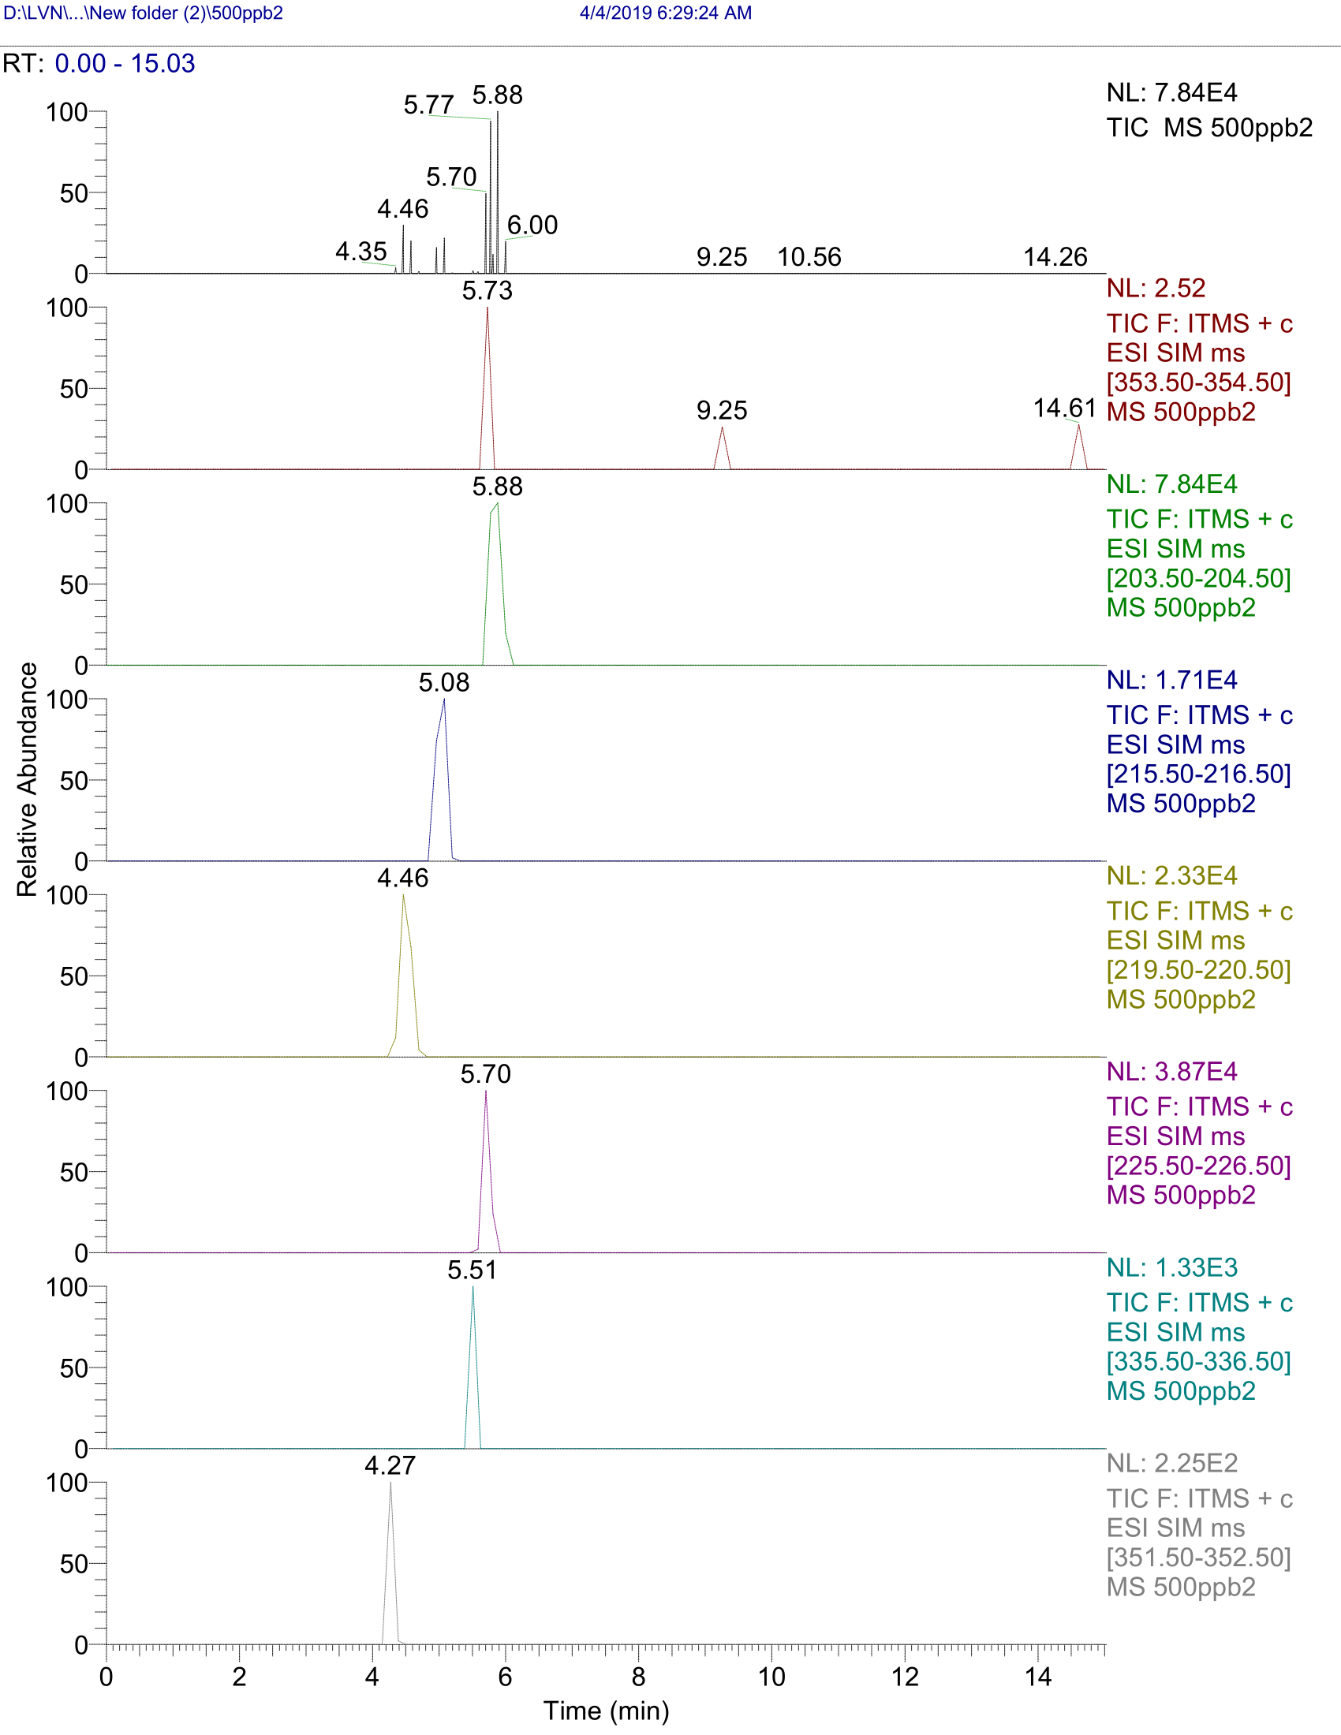


Ki

BA

iPR

*t*ZR

DHzR

*t*Z

iP

##### Fig S2. Spectra and retention time of seven in mix fourteen phytohormones under positive scan mode (concentration of 500 ppb).


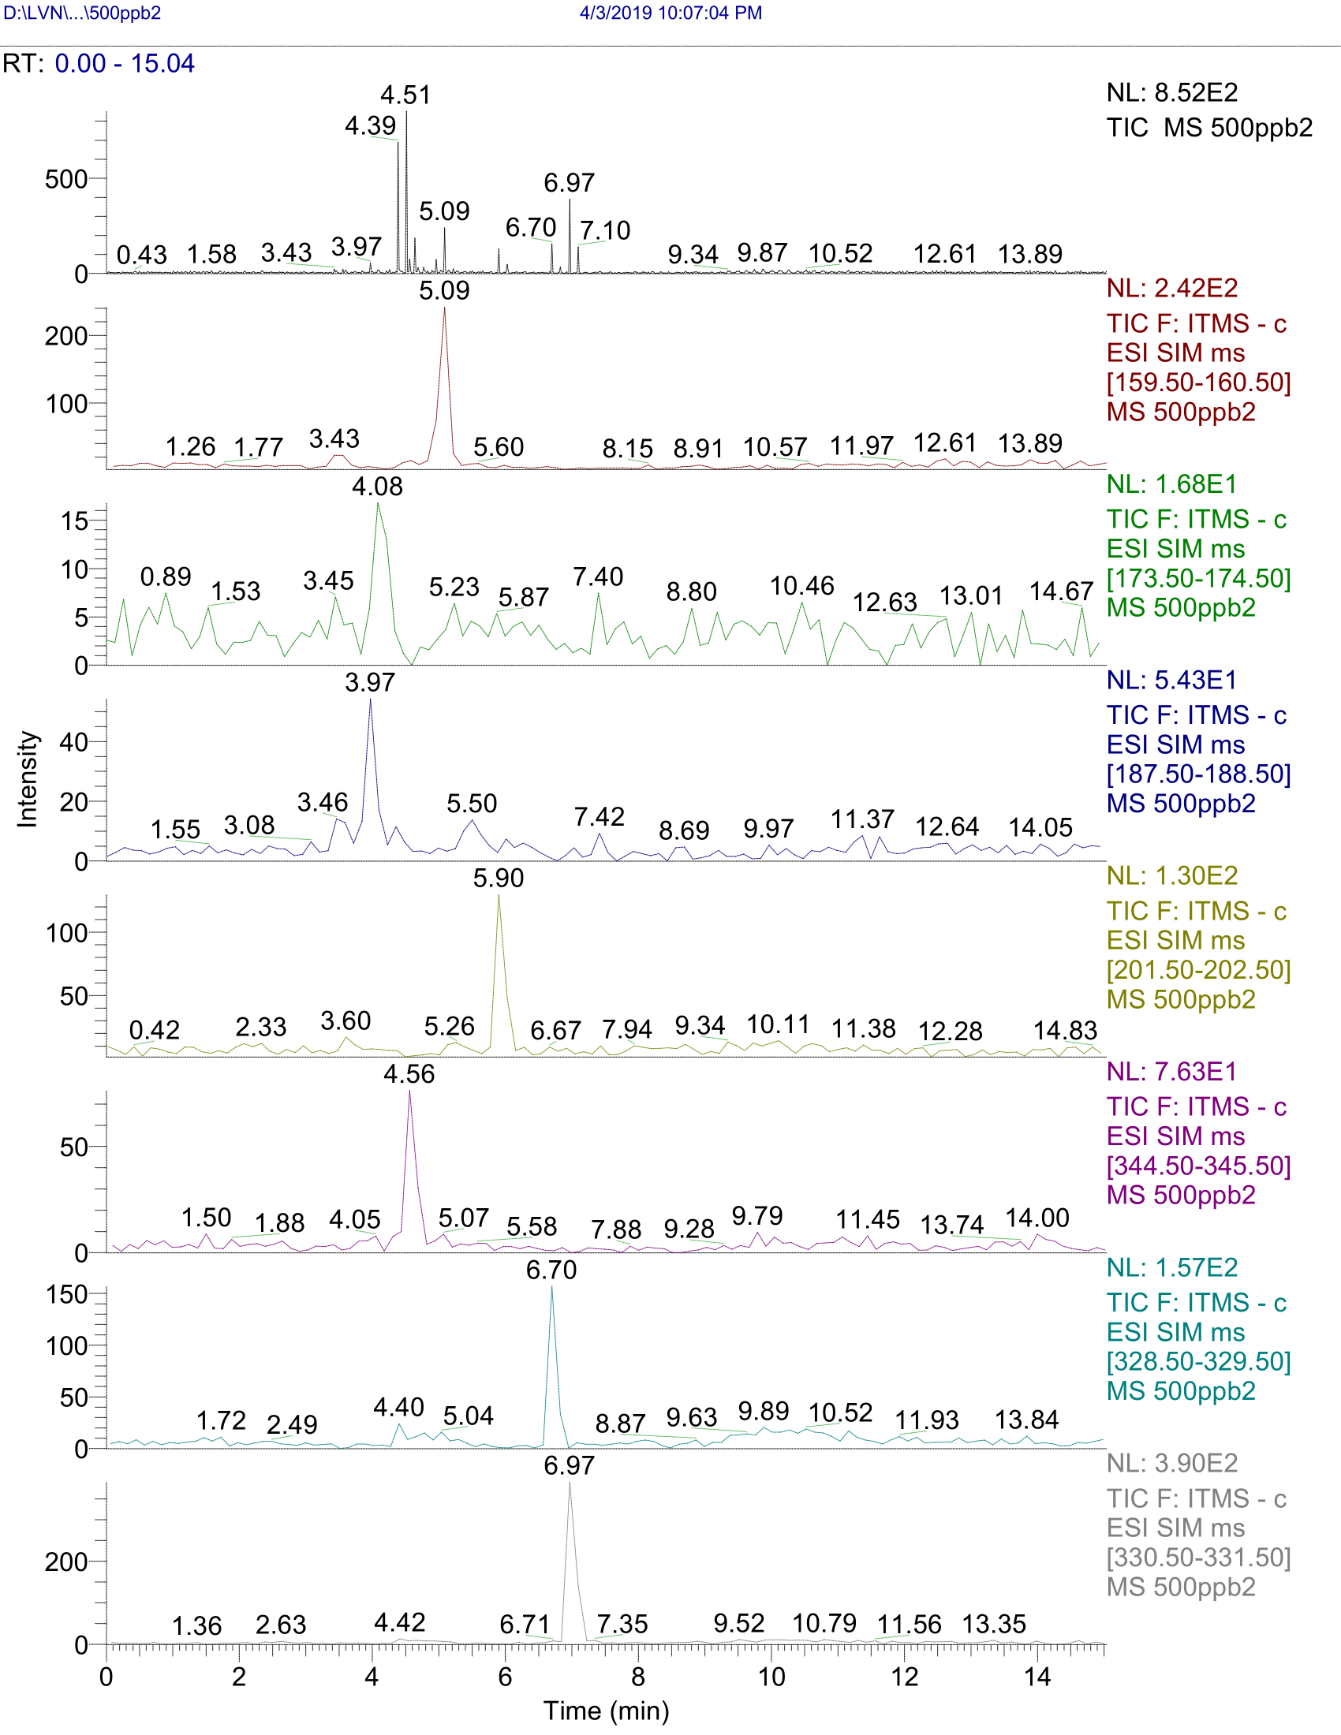


GA4

GA7

IPA

ICA

IAA

IBA

GA3

Relative Abundance

##### Fig S3. Spectra and retention time of seven in mix fourteen phytohormones under negative scan mode (concentration of 500 ppb).


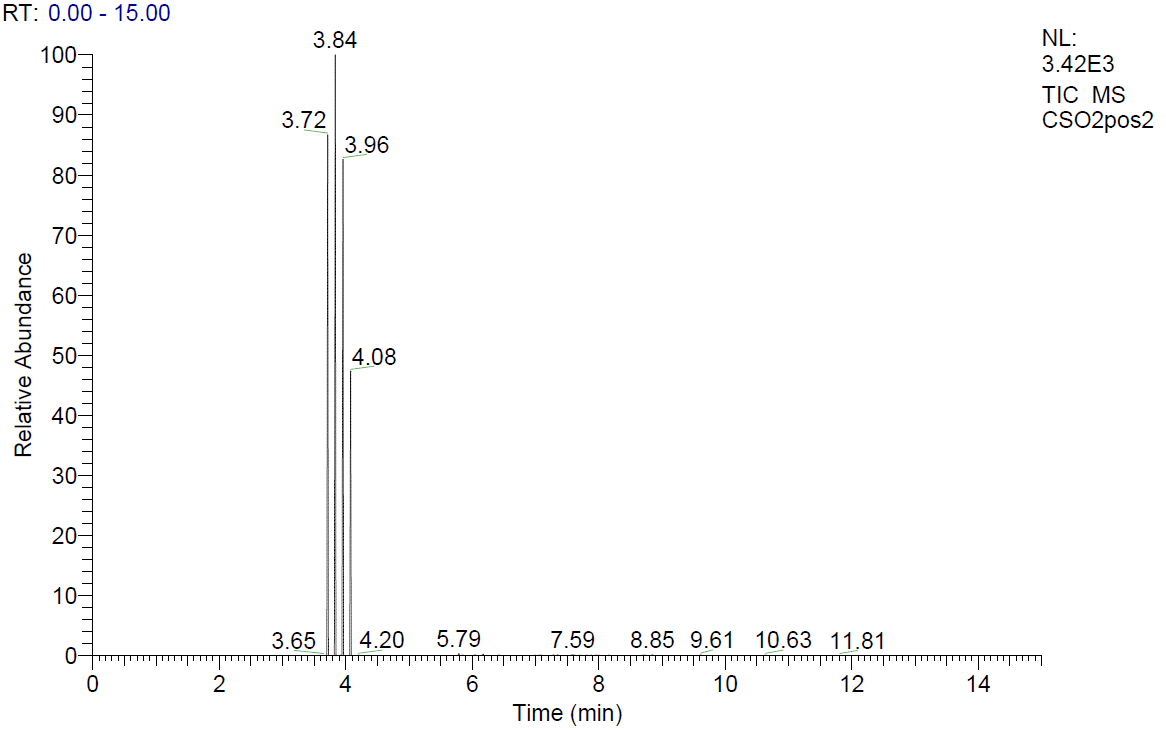

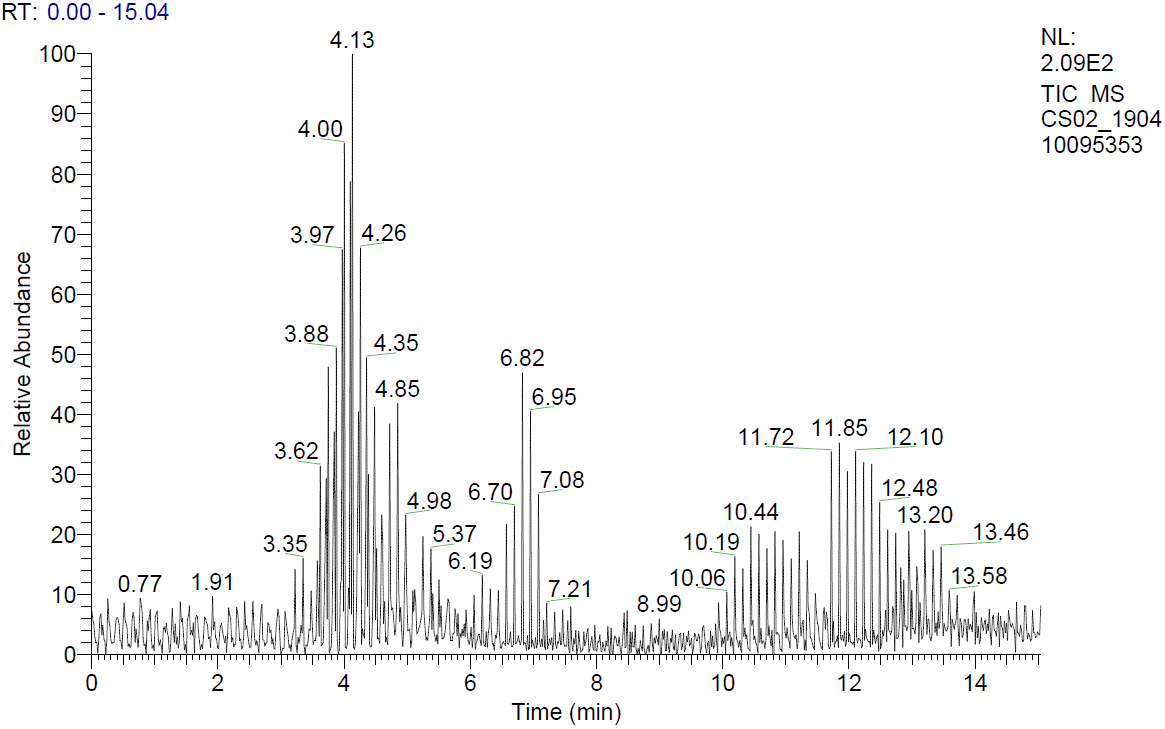


(B)

IPA

IAA

GA7

GA4

(A)

**Fig. S4.** Representative HPLC-ESI-MS/MS spectra of algal extract of *C. sorokiniana* TH01 under positive scan (A) and negative scan (B) mode. IAA, Indole-3-acetic acid; IPA, 3-Indolepropionic acid; GA4, Gibberellin A4; GA7, Gibberellin A7.
